# Supplementary material
Source: PubMed Central journal article supplement (PMC8207329)
Supplement: NIHMS1698056-supplement-Supplemental_Table_1.pdf [file NIHMS1698056-supplement-Supplemental_Table_1.pdf]

Supplemental table #1:

Reasons why patients did not go to transplant consult

| <b>Why did you not go?</b>                                       |   |
|------------------------------------------------------------------|---|
| Insurance would not cover it                                     | 1 |
| Not time yet                                                     | 1 |
| other medical issues                                             | 1 |
| I am concerned about the cost of the transplant                  | 1 |
| I am worried about the impact it will have on my quality of life | 2 |
